# Supplementary material
Source: PubMed Central journal article supplement (PMC6420091)

## **SI Guide**

*PDF containing Supplementary Tables 1,2,3*

### **Supplementary Information Table 1**

List of Primer Sequences used for quantitative RT-PCR. Gene (or locus) name as described in the manuscript with associated forward and reverse primer.

### **Supplementary Information Table 2**

List of antibodies used for Flow Cytometry, Histology, Western Blot and ChIP. Target of the antibody is listed, followed by clone name, commercial vendor, catalogue number and the most recently used lot of this antibody.

### **Supplementary Information Table 3**

Gene list of GSEA genesets

Genesets from Figure 2a,b and Extended Data Figure 4c are displayed in detail. All contained genes are shown with expression values of individual samples as a heatmap with normalized values per row. Enrichment scale is displayed on the right side of every heatmap with outliers marked in bright yellow.

Supplementary Information Table 1 Primer (Gronke et al.)

| <i>Gene</i> |         | <i>Sequence</i>                |
|-------------|---------|--------------------------------|
| Atm         | Forward | AGCTTGTGAAGGGCCGTGATGA         |
|             | Reverse | AACACCGCTTCGCTGAGAAAGG         |
| Atm Cold    | Forward | TAAGCTGGCACTGAACTCCC           |
|             | Reverse | CACGTTCTGAAGTCCTGGTTC          |
| Atm End     | Forward | CCATCAGCCACAGGACTTTC           |
|             | Reverse | TCCTCCTTTACTCTCGTGGC           |
| Atm Mid     | Forward | ACCAGCTTCCAATACTGTTCC          |
|             | Reverse | AAGTGCCTCTGTTAGTCATCC          |
| Atm Start   | Forward | TCAGGTATTGCAGGCCTAGG           |
|             | Reverse | AGCCTGACCATAGAACCCAC           |
| Atmin       | Forward | ATGCACCTCGTCAAGAGCC            |
|             | Reverse | ACATCCTTTGATTGGACAACAGT        |
| Atr         | Forward | AGTTGGCCAGTGCTACTCCAGA         |
|             | Reverse | GGTCGGCTGAGCGTCAGTTTTCTT       |
| Bbc3        | Forward | TTCTCCGGAGTGTTTCATGC           |
|             | Reverse | TACAGCGGAGGGGCATCAG            |
| Cdkn1a      | Forward | ATTCAGAGCCACAGGCACCAT          |
|             | Reverse | TCTCCGTGACGAAGTCAAAGTT         |
| cMyc        | Forward | CCTAGTGCTGCATGAGGAGA           |
|             | Reverse | TCTTCCTCATCTTCTTGCTCTTC        |
| Cxcl2       | Forward | ACCAACCACCAGGCTAGA             |
|             | Reverse | GCGTCACACTCAAGCTCT             |
| GAPDH       | Forward | TGCACCACCAACTGCTTAGC           |
|             | Reverse | GGCATGGACTGTGGTCATGAG          |
| HPRT        | Forward | TCAGTCAACGGGGGACATAAA          |
|             | Reverse | GGGGCTGTACTGCTTAACCAG          |
| Ifng        | Forward | ATCTGGAGGAACTGGCAAAA           |
|             | Reverse | TTCAAGACTTCAAAGAGTCTGAGGTA     |
| Il17a       |         | Mm00439618_m1                  |
|             |         | Taqman Thermo Fisher           |
| Il10r2      | Forward | ACCTGCTTTCCCAAACGAA            |
|             | Reverse | TGAGAGAAGTCGCACTGAGTC          |
| Il1a        | Forward | TTGGTTAATGACCTGCAACA           |
|             | Reverse | GAGCGCTCACGAACAGTTG            |
| Il1b        | Forward | TGTAATGAAAGACGGCACACC          |
|             | Reverse | TCTTCTTTGGGTATTGCTTGG          |
| Il20r2      | Forward | ACCCCTTTAACCGAAATGCAA          |
|             | Reverse | CCTCCAGTAGACCACAAGGAA          |
| Il22bp      | Forward | ACAACAGCATCTACTTTGTGCAG        |
|             | Reverse | CCCCAGCAGTCAACTTTAT            |
| Il23a       | Forward | ATGCTGGATTGCAGAGCAGTA          |
|             | Reverse | ACGGGGCACATTATTTTAGTCT         |
| Il6         | Forward | TCG GAG GCT TAA TTA CAC ATG TT |
|             | Reverse | GCATCATCGTTGTTTCATACAATC       |
| Mre11       | Forward | CTTGTACGACTGCGAGTGGA           |
|             | Reverse | TTCACCCATCCCTCTTTCTG           |

|       |         |                          |
|-------|---------|--------------------------|
| Nbn   | Forward | TTGGTTGCATGCTCTTCTTG     |
|       | Reverse | GGCTGCTTCTTGGACTCAAC     |
| Nos2  | Forward | GGGCTGTCACGGAGATCA       |
|       | Reverse | CCATGATGGTCACATTCTGC     |
| Parp1 | Forward | ATGGCCAGGACGAAGAGGCAGTAA |
|       | Reverse | TCAGCTTCCCCAAGGGCATCTTCT |
| Prkdc | Forward | AAACCTGTTCCGAGCTTTTCTG   |
|       | Reverse | TCTCAATCTGAGGACGAATTGC   |
| Rad50 | Forward | CTTGGATATGCGAGGACGAT     |
|       | Reverse | CCAGAAGCTGGAAGTTACGC     |
| Reg3g | Forward | TTCCTGTCCTCCATGATCAAAA   |
|       | Reverse | CATCCACCTCTGTTGGGTTCA    |
| Tgfb  | Forward | TGGAGCAACATGTGGAAGCTC    |
|       | Reverse | CAGCAGCCGGTTACCAAG       |

Supplementary Information Table 2 Antibodies (Gronke et al.)

**Flow Cytometry**

| Target            | Clone      | Vendor            | Cat number | Most recent Lot# |
|-------------------|------------|-------------------|------------|------------------|
| CD3e              | 145-2C11   | eBioscience       | 13-0031-82 | E02347-1633      |
| CD5               | 53-7.3     | eBioscience       | 13-0051-82 | 4319149          |
| CD19              | MB19-1     | eBioscience       | 13-0191-85 | E02440-1633      |
| Gr-1              | RB6-8C5    | eBioscience       | 13-5931-82 | 4310389          |
| F4/80             | BM8        | Biolegend         | 123106     | B203671          |
| CD64              | X54-5/7.1  | Biolegend         | 139318     | B224829          |
| CD45.2            | 104        | eBioscience       | 47-0454-82 | 4302540          |
| TCRb              | H57-597    | eBioscience       | 45-5961-80 | E08409-1633      |
| TCRgd             | GL3        | Biolegend         | 118123     | B211410          |
| CD4               | RM4-5      | eBioscience       | 48-0042-82 | 4313102          |
| RORgt             | B2D        | eBioscience       | 17-6981-82 | 4291992          |
| IL-22             | 1H8PWSR    | eBioscience       | 12-7221-80 | 4299218          |
| IL-17a            | eBio17B7   | eBioscience       | 11-7177-81 | E08894-1632      |
| EpCam             | G8.8       | eBioscience       | 17-5791-82 | 4298465          |
| CD24              | 30-F1      | eBioscience       | 12-0241-81 | B180222          |
| CD45              | 30-F11     | eBioscience       | 25-0451-82 | 4302540          |
| Cleaved Caspase 3 | C92-605    | BD Biosciences    | 560626     | 7179554          |
| FoxP3             | MF-14      | Biolegend         | 126409     | B239211          |
| IL-10             | JES5-16E3  | eBiosciences      | 53-7101-82 | 4325142          |
| Atm               | 2C1 (1A1)  | Abcam             | #ab78      | GR3192658-10     |
| anti-mouse-AI555  | Polyclonal | Life Technologies | A21425     | 1635618          |

**Histology**

| Target            | Clone      | Vendor            | Cat number  | Most recent Lot# |
|-------------------|------------|-------------------|-------------|------------------|
| DAPI              |            | Sigma-Aldrich     | 32670-5MG-F | 075M4010V        |
| EpCam             | G8.8       | eBioscience       | 17-5791-82  | 4298465          |
| cleaved Caspase-3 | 5A1E       | CST               | #9664       | 18               |
| gH2AX             | 20E3       | CST               | #9718       | 10               |
| Il22ra1           | 496514     | Thermo Fisher     | MA5-24205   | GR272657-7       |
| anti-rabbit-AI555 | Polyclonal | Life Technologies | A31572      | 1806147          |
| anti-rabbit-APC   | Polyclonal | Life Technologies | A10931      | 1351950          |
| anti-rat-AI647    | Polyclonal | Life Technologies | A21247      | 1939630          |

**Western Blot**

| Target          | Clone      | Vendor                   | Cat number  | Most recent Lot# |
|-----------------|------------|--------------------------|-------------|------------------|
| Puma            | polyclonal | Abcam                    | ab9643      | GR255116-3       |
| p21             | F5         | Santa Cruz Biotechnology | sc-6246     | F2612            |
| Beta-Actin      | AC-15      | Sigma-Aldrich            | A5441-100UL |                  |
| Atm             | D2E2       | CST                      | 2873S       | 3                |
| H2AX            | D17A3      | CST                      | 7631P       | 4                |
| p-p53           | D4S1H      | CST                      | 12571S      | 3                |
| p-SMC           | D7S8Y      | CST                      | 58052S      | 1                |
| SMC             | 8E6        | CST                      | 6892S       | 1                |
| anti-rabbit-HRP |            | Jackson ImmunoResearch   | 111-035-144 | 49411            |
| anit-mouse-HRP  |            | Jackson ImmunoResearch   | 115-035-003 | 130129           |

**ChIP**

| Target | Clone | Vendor                   | Cat number |
|--------|-------|--------------------------|------------|
| STAT3  | C-20  | Santa Cruz Biotechnology | sc-482 X   |

# Kauffmann\_DNA\_Repair\_Genes

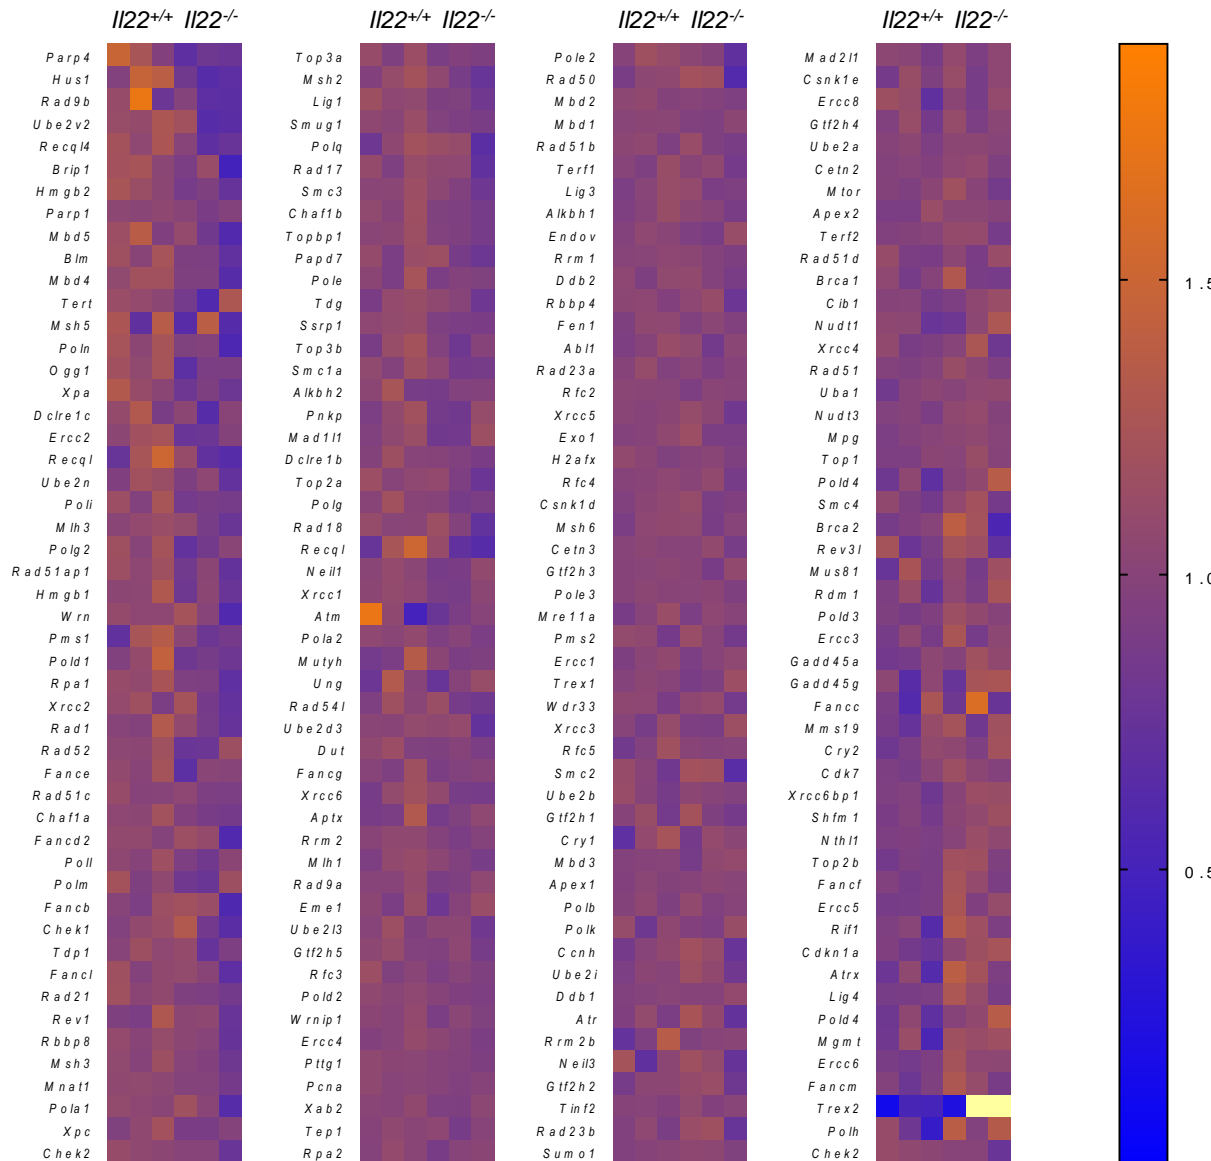

# GO\_DNA\_Double Strand\_Break\_Processing

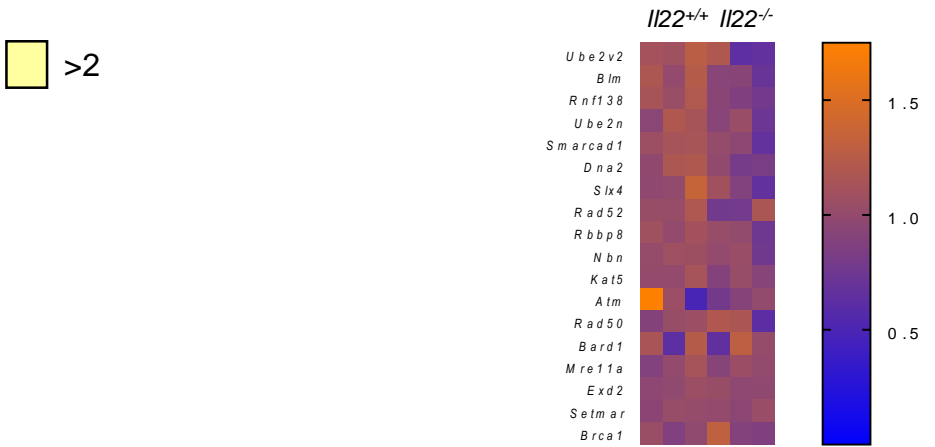

Supplementary Information Table 3: **Gene list of GSEA genesets**  
 Genesets from Fig 2a,b and Extended Data Figure 4c are displayed in detail. All contained genes are shown with expression values of individual samples as a heatmap with normalized values per row. Enrichment scale is displayed on the right side of every heatmap with outliers marked in bright yellow.

# Hallmark\_Apoptosis

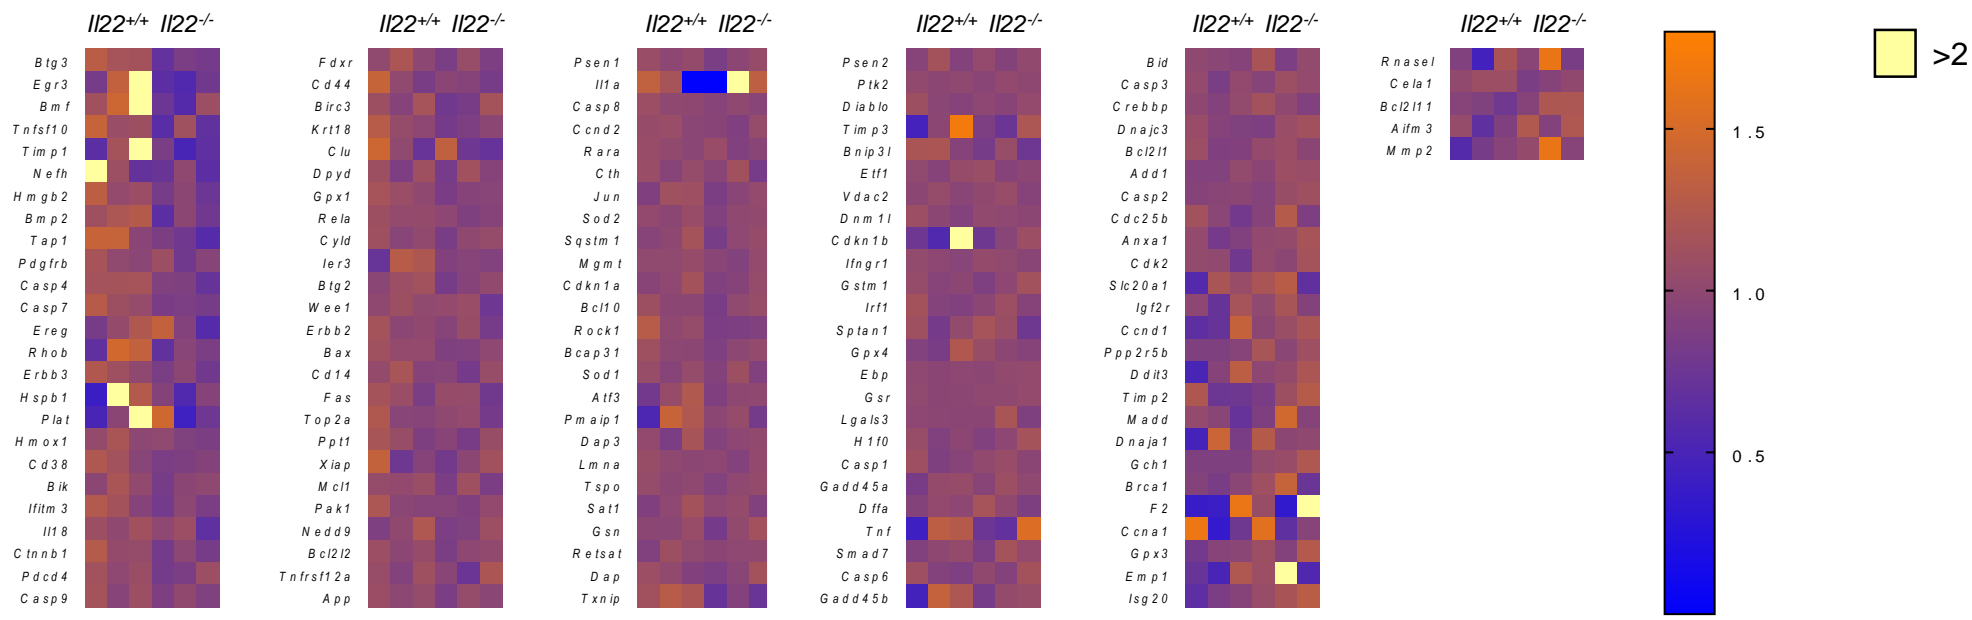

# DDR\_Effector\_Genes

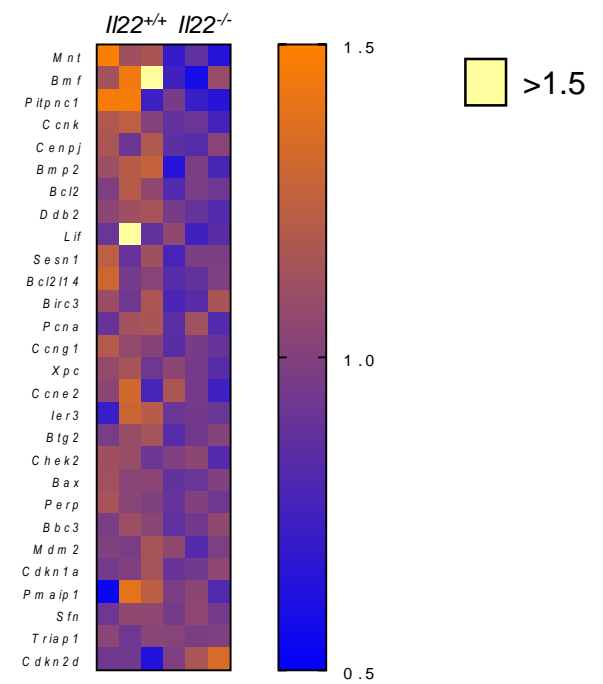

Supplement: NIHMS81063-supplement-Supplementary_tables.pdf [file NIHMS81063-supplement-Supplementary_tables.pdf]
